# Supplementary material for: Preparation of silver decorated silica nanocomposite rods for catalytic and surface-enhanced Raman scattering applications
Source: Royal Society of Chemistry journal article supplement (doi:10.1039/c5ra08076b), 2015-01-01
Supplement: c5ra08076b1.pdf [file c5ra08076b1.pdf]

# Electronic Supplementary Information

## **Preparation of Silver Decorated Silica Nanocomposite rods for Catalytic and Surface-Enhanced Raman Scattering Applications**

Kai Zhao,<sup>a</sup> Chengjiao Wu,<sup>a</sup> Ziwei Deng,<sup>\*a</sup> Yingcen Guo<sup>\*b</sup> and Bo Peng<sup>\*c</sup>

<sup>a</sup> School of Materials Science and Engineering, Shaanxi Normal University, Xi'an, 710062, China

<sup>b</sup> Guangxi Zhuang Autonomous Region Institute of Product Quality Inspection, Nanning, 537007, China

<sup>c</sup> Department of Chemistry, Physical and Theoretical Chemistry Laboratory, University of Oxford, South Parks Road, Oxford OX1 3QZ, United Kingdom

\* Corresponding authors:

\* Dr. Ziwei Deng Tel:+86-29-81530804. E-mail: zwdeng@snnu.edu.cn

\* Dr. Yingcen Guo Tel:+86-771-5852109. E-mail: eve1220@163.com

\* Dr. Bo Peng Tel: +44-1865285417. E-mail: pengbo006@gmail.com

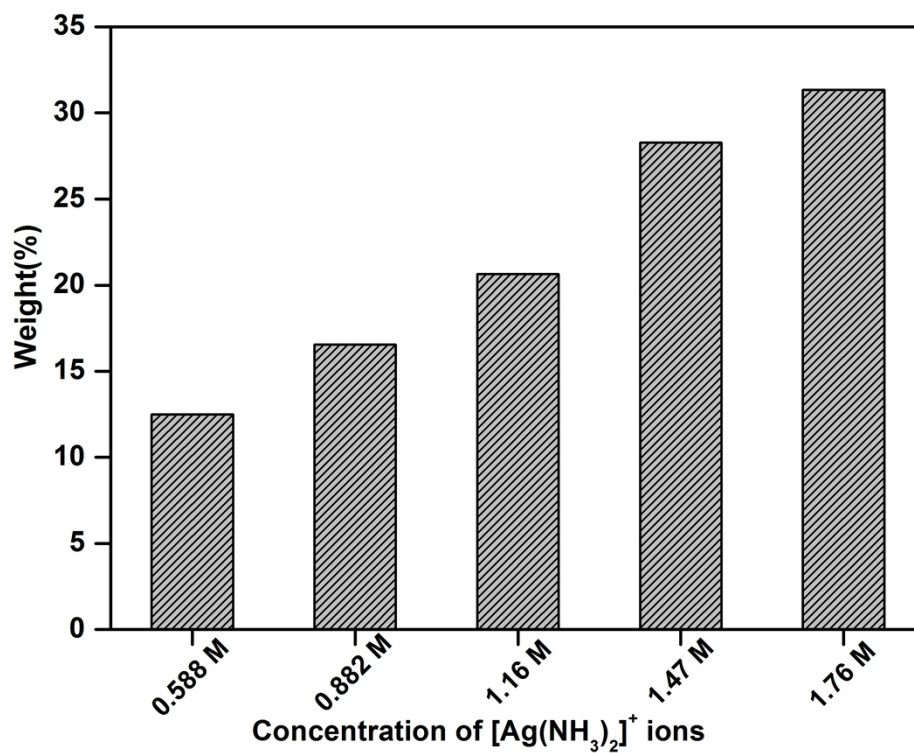

**Fig.S1** The amount of Ag nanoparticles on SiO<sub>2</sub>@Ag nanocomposite rods prepared at the different concentrations of [Ag(NH<sub>3</sub>)<sub>2</sub>]<sup>+</sup> ions (0.588; 0.882; 1.16; 1.47 and 1.76 M).

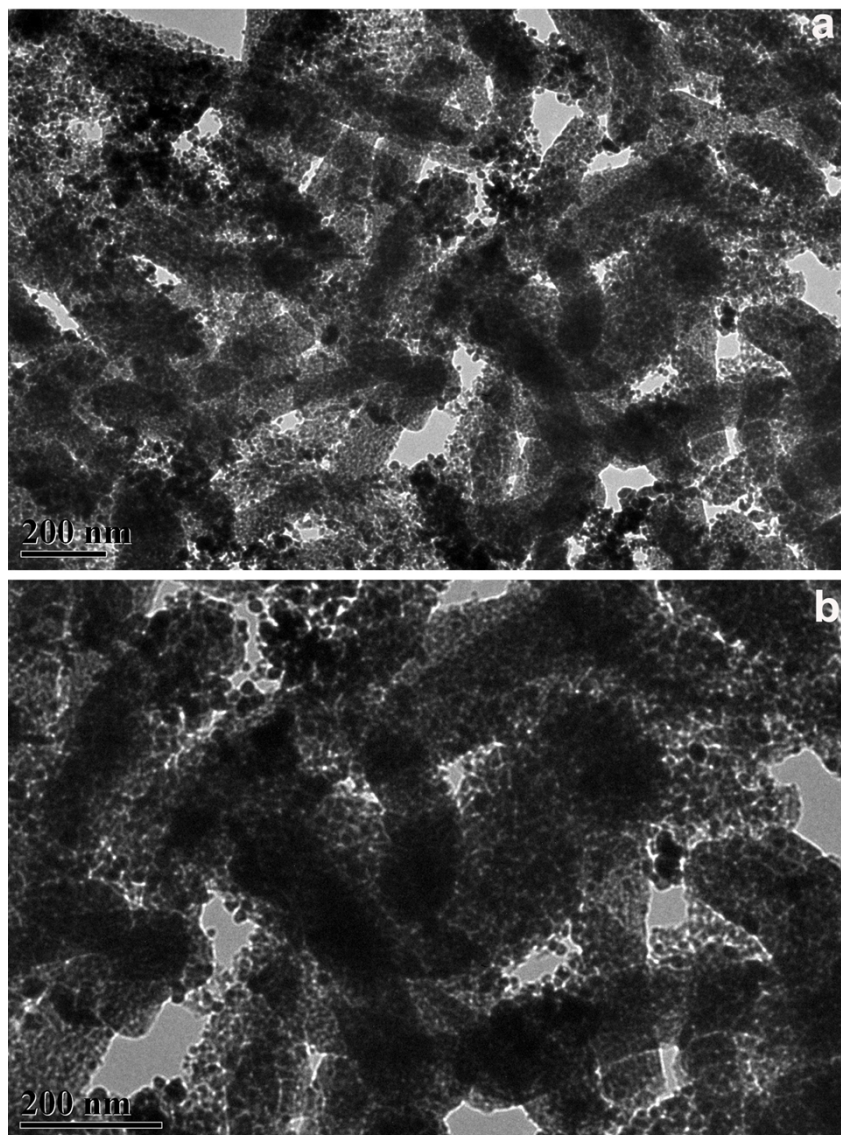

**Fig.S2** Transmission electron microscopy (TEM) images of SiO<sub>2</sub>@Ag nanocomposite rods prepared with 3.52 M of [Ag(NH<sub>3</sub>)<sub>2</sub>]<sup>+</sup> ions: (a) at a low magnification 12 K; (b) at a high magnification 20 K.
